# Supplementary material for: The relationship between the electronic structure and thermoelectric properties of Zintl compounds M2Zn5As4 (M = K, Rb)
Source: Royal Society of Chemistry journal article supplement (doi:10.1039/c3cp54545h), 2014-01-01
Supplement: c3cp54545h.pdf [file c3cp54545h.pdf]

The comparison of the Seebeck coefficients between the experimental and theoretical values.

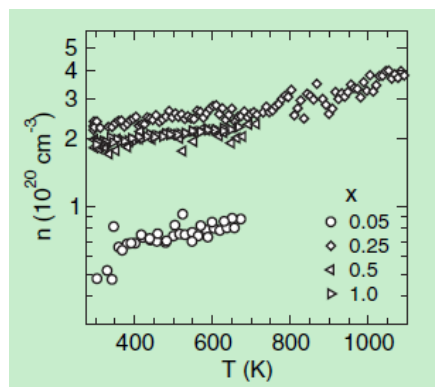

Fig. 1. The Hall Carrier concentration is constant with temperature for all  $\text{Ca}_{5-x}\text{Na}_x\text{Al}_2\text{Sb}_6$  compositions, suggesting the successful formation of heavily doped semiconductor.

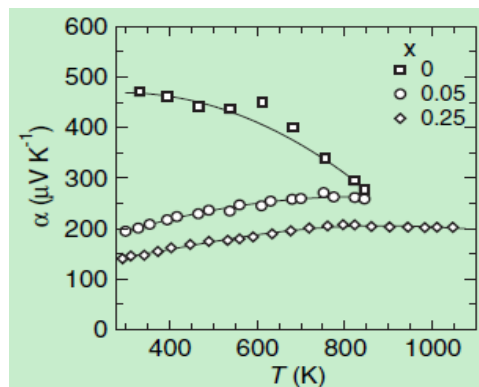

Fig. 2. High-temperature Seebeck coefficients of  $\text{Ca}_{5-x}\text{Na}_x\text{Al}_2\text{Sb}_6$  show decreasing magnitude with increasing carrier concentration.

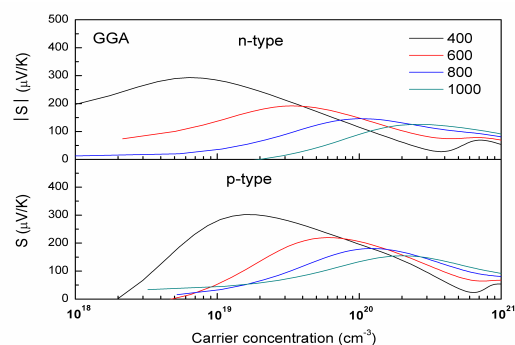

Fig. 3. Calculated Seebeck coefficients of  $\text{Ca}_5\text{Al}_2\text{Sb}_6$  with GGA.

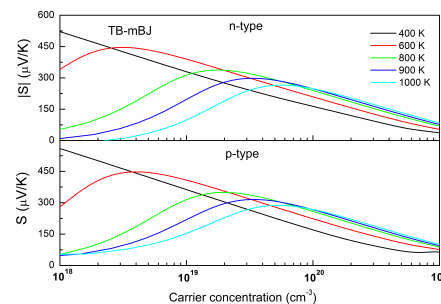

Fig. 4. Calculated Seebeck coefficients of  $\text{Ca}_5\text{Al}_2\text{Sb}_6$  with TB-mBJ.

Fig. 1 and Fig. 2 are the experimental data in Ref. 20 (Advanced Functional Materials 20 (2010) 4375), which corresponds to the p-type doping. Fig. 3 and Fig. 4 are the theoretical values calculated by different exchange-correlation potentials. We list them in below table for comparison. We can see that the theoretical Seebeck coefficients calculated by TB-mBJ are more consistent with the experimental results.

| Temperature (K) | Carriers concentration ( $\text{cm}^{-3}$ ) | Seebeck(experiment) ( $\mu\text{V/K}$ ) | Seebeck (GGA) ( $\mu\text{V/K}$ ) p-type | Seebeck(TB-mBJ) ( $\mu\text{V/K}$ ) p-type |
|-----------------|---------------------------------------------|-----------------------------------------|------------------------------------------|--------------------------------------------|
| 400             | $x=0$                                       | 460                                     | 300(biggest)                             | 566(biggest)                               |
| 400             | $6.6 \times 10^{19}$ ( $x=0.05$ )           | 210                                     | 230                                      | 207                                        |
| 400             | $2.3 \times 10^{20}$ ( $x=0.25$ )           | 160                                     | 120                                      | 115                                        |

|      |                               |     |              |              |
|------|-------------------------------|-----|--------------|--------------|
| 600  | x=0                           | 420 | 220(biggest) | 440(biggest) |
| 600  | $7.2 \times 10^{19}$ (x=0.05) | 245 | 215          | 248          |
| 600  | $2.6 \times 10^{20}$ (x=0.25) | 170 | 160          | 165          |
| 800  | x=0                           | 300 | 185(biggest) | 345(biggest) |
| 800  | $2.8 \times 10^{20}$ (x=0.25) | 180 | 150          | 178          |
| 1000 | $3.2 \times 10^{20}$ (x=0.25) | 175 | 146          | 180          |
